# Supplementary material for: Glomerular Hyperfiltration and Cancer: A Nationwide Population-Based Study
Source: Oxford University Press journal article supplement (doi:10.1158/1055-9965.epi-20-0078), 2020-07-22
Supplement: 10559965epi200078-sup-235689_3_supp_6397976_qck45f.docx [file 10559965epi200078-sup-235689_3_supp_6397976_qck45f.docx]

**Supplementary Table S1.** National cancer screening service program in South Korea

| **Variables** | **Application subjects** | **Cycle for screening** |
| --- | --- | --- |
| Stomach cancer | ≥40 years old, male and female | 2-year |
| Colorectal cancer | ≥50 years old, male and female | 1-year |
| Liver cancer | ≥40 years old, high-risk subjects* | 6-month |
| Breast cancer | ≥40 years old, female | 2-year |
| Cervical cancer | ≥20 years old, female | 2-year |

* liver cirrhosis, hepatitis B antigen (+), hepatitis C antibody (+), chronic liver disease associated with hepatitis B or C
