# Supplementary material for: Glomerular Hyperfiltration and Cancer: A Nationwide Population-Based Study
Source: Oxford University Press journal article supplement (doi:10.1158/1055-9965.epi-20-0078), 2020-07-22
Supplement: 10559965epi200078-sup-235689_3_supp_6397977_qc845f.docx [file 10559965epi200078-sup-235689_3_supp_6397977_qc845f.docx]

**Supplementary Table S2.** ICD-10 diagnostic codes used to define the variables

| Body systems | Organs | ICD-10 codes |
| --- | --- | --- |
| Oral cavity, lip, pharynx |  | C00-14 |
| Digestive organ |  | C15-26 |
|  | Stomach | C16 |
|  | Colorectum | C18-19 |
|  | Liver or intrahepatic organ | C22 |
| Respiratory and intrathoracic organ |  | C30-39 |
|  | Lung | C34 |
| Female genital organ |  | C51-58 |
|  | Cervix | C53 |
|  | Uterus and ovary | C54-56 |
| Male genital organ |  | C60-63 |
|  | Testis | C62 |
|  | Prostate | C61 |
| Urinary tract system |  | C64-68 |
|  | Kidney | C64 |
|  | Other urinary tract organ | C65-68 |
| Thyroid |  | C73 |
| Breast |  | C50 |

Abbreviation: ICD, international Statistical Classification of Diseases and Rlated Health Problems
